# Supplementary material
Source: publisher figshare collection journal article supplement (https://sage.figshare.com/ndownloader/files/14746667)
Supplement: Supplementary file 1 [file 14746667]

**Appendix A.** Mapping of Web of Science Research Areas (WoSRAs) to Global Institutional Profiles Project (GIPP) category designations ranked by number of representing articles in the 2006-2017 CTSA publication portfolio

| <b>Clinical, Pre-Clinical &amp; Health</b>    | <b>#<br/>articles</b> | <b>Life Sciences</b>                 | <b>#<br/>articles</b> | <b>Social Sciences</b>                | <b>#<br/>articles</b> |
|-----------------------------------------------|-----------------------|--------------------------------------|-----------------------|---------------------------------------|-----------------------|
| Oncology                                      | 4,157                 | Neurosciences                        | 4,646                 | Psychology, Clinical                  | 855                   |
| Clinical Neurology                            | 4,066                 | Oncology                             | 4,157                 | Health Policy & Services              | 853                   |
| Endocrinology & Metabolism                    | 4,022                 | Endocrinology & Metabolism           | 4,022                 | Psychology                            | 794                   |
| Public, Environmental & Occupational Health   | 3,624                 | Immunology                           | 3,983                 | Gerontology                           | 735                   |
| Pediatrics                                    | 3,568                 | Biochemistry & Molecular Biology     | 2,975                 | Psychology, Developmental             | 571                   |
| Psychiatry                                    | 2,989                 | Cardiac & Cardiovascular Systems     | 2,835                 | Psychology, Multidisciplinary         | 430                   |
| Cardiac & Cardiovascular Systems              | 2,835                 | Genetics & Heredity                  | 2,538                 | Social Sciences, Biomedical           | 420                   |
| Surgery                                       | 2,578                 | Pharmacology & Pharmacy              | 2,405                 | Education, Scientific Disciplines     | 258                   |
| Pharmacology & Pharmacy                       | 2,405                 | Cell Biology                         | 2,362                 | Psychology, Experimental              | 225                   |
| Infectious Diseases                           | 2,261                 | Peripheral Vascular Disease          | 1,648                 | Social Sciences, Interdisciplinary    | 135                   |
| Medicine, Research & Experimental             | 2,225                 | Gastroenterology & Hepatology        | 1,574                 | Psychology, Biological                | 133                   |
| Urology & Nephrology                          | 1,795                 | Microbiology                         | 1,279                 | Women's Studies                       | 131                   |
| Obstetrics & Gynecology                       | 1,773                 | Physiology                           | 1,009                 | Ethics                                | 126                   |
| Radiology, Nuclear Medicine & Medical Imaging | 1,763                 | Virology                             | 862                   | Family Studies                        | 119                   |
| Health Care Sciences & Services               | 1,708                 | Biotechnology & Applied Microbiology | 845                   | Education & Educational Research      | 80                    |
| Respiratory System                            | 1,679                 | Biochemical Research Methods         | 832                   | Linguistics                           | 67                    |
| Hematology                                    | 1,656                 | Transplantation                      | 760                   | Social Issues                         | 65                    |
| Peripheral Vascular Disease                   | 1,648                 | Mathematical & Computational Biology | 657                   | Psychology, Applied                   | 60                    |
| Gastroenterology & Hepatology                 | 1,574                 | Behavioral Sciences                  | 491                   | Social Work                           | 57                    |
| Critical Care Medicine                        | 1,416                 | Biophysics                           | 387                   | Communication                         | 50                    |
| Nutrition & Dietetics                         | 1,408                 | Pathology                            | 374                   | Education, Special                    | 49                    |
| Geriatrics & Gerontology                      | 1,124                 | Toxicology                           | 345                   | Psychology, Social                    | 49                    |
| Rheumatology                                  | 925                   | Reproductive Biology                 | 282                   | Economics                             | 24                    |
| Medical Informatics                           | 760                   | Biology                              | 273                   | Anthropology                          | 21                    |
| Transplantation                               | 760                   | Multidisciplinary Sciences           | 241                   | Law                                   | 20                    |
| Sport Sciences                                | 733                   | Developmental Biology                | 224                   | Psychology, Educational               | 20                    |
| Allergy                                       | 718                   | Environmental Sciences               | 207                   | Criminology & Penology                | 17                    |
| Substance Abuse                               | 703                   | Cell & Tissue Engineering            | 202                   | Sociology                             | 16                    |
| Orthopedics                                   | 686                   | Parasitology                         | 189                   | Demography                            | 14                    |
| Rehabilitation                                | 654                   | Veterinary Sciences                  | 154                   | Social Sciences, Mathematical Methods | 14                    |
| Nursing                                       | 649                   | Zoology                              | 55                    | Ethnic Studies                        | 12                    |
| Ophthalmology                                 | 612                   | Food Science & Technology            | 53                    | Psychology, Mathematical              | 11                    |
| Neuroimaging                                  | 545                   | Anatomy & Morphology                 | 46                    | Management                            | 8                     |
| Emergency Medicine                            | 537                   | Plant Sciences                       | 43                    | Hospitality, Leisure, Sport & Tourism | 5                     |
| Anesthesiology                                | 504                   | Evolutionary Biology                 | 30                    | Geography                             | 4                     |
| Otorhinolaryngology                           | 475                   | Ecology                              | 23                    | Environmental Studies                 | 3                     |
| Dermatology                                   | 458                   | Andrology                            | 22                    | Business                              | 2                     |
| Medicine, General & Internal                  | 388                   | Mycology                             | 17                    | International Relations               | 2                     |
| Pathology                                     | 374                   | Agriculture, Multidisciplinary       | 7                     | Planning & Development                | 1                     |
| Dentistry, Oral Surgery & Medicine            | 358                   | Biodiversity Conservation            | 4                     | Political Science                     | 1                     |
| Primary Health Care                           | 234                   | Entomology                           | 4                     | Public Administration                 | 1                     |
| Medical Laboratory Technology                 | 165                   | Marine & Freshwater Biology          | 2                     | Urban Studies                         | 1                     |
| Tropical Medicine                             | 139                   | Agriculture, Dairy & Animal Science  | 1                     |                                       |                       |
| Audiology & Speech-Language Pathology         | 124                   |                                      |                       |                                       |                       |
| Medical Ethics                                | 124                   |                                      |                       |                                       |                       |
| Integrative & Complementary Medicine          | 69                    |                                      |                       |                                       |                       |
| Medicine, Legal                               | 25                    |                                      |                       |                                       |                       |
| <b>47 WoSRAs</b>                              | <b>63,993</b>         | <b>43 WoSRAs</b>                     | <b>43,065</b>         | <b>42 WoSRAs</b>                      | <b>6,459</b>          |

## Appendix A. Continued

| <b>Engineering &amp; Technology</b>              | <b>#<br/>articles</b> | <b>Physical Sciences</b>                    | <b>#<br/>articles</b> | <b>Arts &amp; Humanities</b>    | <b>#<br/>articles</b> |
|--------------------------------------------------|-----------------------|---------------------------------------------|-----------------------|---------------------------------|-----------------------|
| Engineering, Biomedical                          | 569                   | Statistics & Probability                    | 486                   | Linguistics                     | 67                    |
| Computer Science, Interdisciplinary Applications | 521                   | Chemistry, Multidisciplinary                | 325                   | History & Philosophy of Science | 10                    |
| Computer Science, Information Systems            | 277                   | Multidisciplinary Sciences                  | 241                   | Religion                        | 10                    |
| Information Science & Library Science            | 268                   | Chemistry, Medicinal                        | 234                   | Philosophy                      | 8                     |
| Materials Science, Biomaterials                  | 178                   | Chemistry, Analytical                       | 227                   |                                 |                       |
| Materials Science, Multidisciplinary             | 135                   | Nanoscience & Nanotechnology                | 198                   |                                 |                       |
| Engineering, Electrical & Electronic             | 118                   | Chemistry, Physical                         | 132                   |                                 |                       |
| Acoustics                                        | 91                    | Chemistry, Organic                          | 128                   |                                 |                       |
| Computer Science, Artificial Intelligence        | 54                    | Optics                                      | 108                   |                                 |                       |
| Ergonomics                                       | 47                    | Physics, Applied                            | 74                    |                                 |                       |
| Engineering, Industrial                          | 37                    | Spectroscopy                                | 73                    |                                 |                       |
| Imaging Science & Photographic Technology        | 36                    | Physics, Condensed Matter                   | 48                    |                                 |                       |
| Computer Science, Theory & Methods               | 33                    | Chemistry, Applied                          | 27                    |                                 |                       |
| Instruments & Instrumentation                    | 15                    | Physics, Atomic, Molecular & Chemical       | 26                    |                                 |                       |
| Nuclear Science & Technology                     | 15                    | Mathematics, Interdisciplinary Applications | 24                    |                                 |                       |
| Engineering, Environmental                       | 12                    | Polymer Science                             | 24                    |                                 |                       |
| Transportation                                   | 12                    | Chemistry, Inorganic & Nuclear              | 19                    |                                 |                       |
| Microscopy                                       | 7                     | Electrochemistry                            | 12                    |                                 |                       |
| Engineering, Chemical                            | 6                     | Crystallography                             | 7                     |                                 |                       |
| Engineering, Multidisciplinary                   | 6                     | Physics, Multidisciplinary                  | 5                     |                                 |                       |
| Operations Research & Management Science         | 5                     | Mathematics, Applied                        | 4                     |                                 |                       |
| Computer Science, Cybernetics                    | 4                     | Physics, Fluids & Plasmas                   | 4                     |                                 |                       |
| Mechanics                                        | 4                     | Physics, Mathematical                       | 2                     |                                 |                       |
| Robotics                                         | 4                     | Physics, Particles & Fields                 | 2                     |                                 |                       |
| Telecommunications                               | 4                     | Water Resources                             | 2                     |                                 |                       |
| Automation & Control Systems                     | 3                     | Geography, Physical                         | 1                     |                                 |                       |
| Computer Science, Software Engineering           | 3                     | Physics, Nuclear                            | 1                     |                                 |                       |
| Engineering, Mechanical                          | 3                     |                                             |                       |                                 |                       |
| Computer Science, Hardware & Architecture        | 2                     |                                             |                       |                                 |                       |
| Construction & Building Technology               | 2                     |                                             |                       |                                 |                       |
| Engineering, Aerospace                           | 2                     |                                             |                       |                                 |                       |
| Energy & Fuels                                   | 1                     |                                             |                       |                                 |                       |
| Engineering, Civil                               | 1                     |                                             |                       |                                 |                       |
| Materials Science, Coatings & Films              | 1                     |                                             |                       |                                 |                       |
| Transportation Science & Technology              | 1                     |                                             |                       |                                 |                       |
| <b>35 WoSRAs</b>                                 | <b>2,477</b>          | <b>27 WoSRAs</b>                            | <b>2,434</b>          | <b>4 WoSRAs</b>                 | <b>95</b>             |
